# Supplementary material for: Time-Efficient Myocardial Contrast Partition Coefficient Measurement from Early Enhancement with Magnetic Resonance Imaging
Source: PLoS One. 2014 Mar 25;9(3):e93124. doi: 10.1371/journal.pone.0093124 (PMC3965516; doi:10.1371/journal.pone.0093124)
Supplement: File S1 — Approval Notice from the IRB of Southeast University Zhongda Hospital. (PDF) [file pone.0093124.s004.pdf]

# 东南大学附属中大医院临床研究伦理委员会

## 伦理审查批件

Approval Notice of IRB of Southeast University Zhongda Hospital

批件号 Approval No: 2012ZDIIKY01.0

审查日期 Date of Review: 2012 年 3 月 1 日

|                                                                                                                                                                                                                                                                                      |                           |                                |  |
|--------------------------------------------------------------------------------------------------------------------------------------------------------------------------------------------------------------------------------------------------------------------------------------|---------------------------|--------------------------------|--|
| 项目名称<br>Study Title                                                                                                                                                                                                                                                                  | 磁共振对正常人心脏功能和心肌状态相关指标的调查研究 |                                |  |
| 研究性质 Type of Research:<br>涉及人类受试者的临床研究                                                                                                                                                                                                                                               |                           | 伦理审查方式 Mode of Review:<br>初次审查 |  |
| 主要研究者 Principal Investigator:<br>居胜红 教授                                                                                                                                                                                                                                              |                           | 申办方 Sponsor:<br>东南大学附属中大医院     |  |
| 审查文件 Documents for Review:<br>1、试验方案<br>2、知情同意书<br>3、招募广告<br>4、主要研究者履历                                                                                                                                                                                                               |                           |                                |  |
| 会议审查到会医学伦理委员会委员 Members of IRB Attending Meeting Review:<br>陈宝安(主席), 许德义(药理, 外单位), 改宏斌(律师, 外单位), 刘锦华(社区代表, 外单位), 唐洪丽, 景亮, 杨莉, 王美美, 王慧萍                                                                                                                                               |                           |                                |  |
| 投票结果 the Result of Voting:<br>医学伦理委员会对送审文件进行审阅和讨论, 参加会议人数 9 人, 其中投票人数 9 人, 回避人数 0 人。 投票情况: 同意 0 票, 作必要修改后同意 9 票, 作必要修改后再讨论 0 票, 不同意 0 票, 终止或暂停已批准的试验 0 票。 投票结果: 作必要修改后同意                                                                                                             |                           |                                |  |
| 评审意见 Comments:<br>同意东南大学附属中大医院放射科开展“磁共振对正常人心脏功能和心肌状态相关指标的调查研究”。并对知情同意书作适修改。<br>本研究结束后, 请主要研究者向伦理委员会提交一份研究总结报告。<br><br>主席签名 Signature Chair: 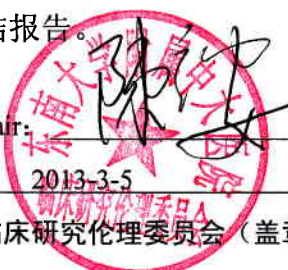<br>签名日期 Date: 2013-3-5<br>东南大学附属中大医院临床研究伦理委员会 (盖章) |                           |                                |  |
| 地址:南京鼓楼区丁家桥 87 号, 邮编: 210009                                                                                                                                                                                                                                                         |                           | 联系电话: 025-83272064             |  |

申明: 本伦理委员会的职责、人员组成、操作程序及记录遵循 ICH-GCP/中国 GCP、中国的相关法律和法规。

**尊敬的东南大学附属中大医院临床研究伦理委员会：**

现就伦理委员会会议结果与伦理审查批件（批件号：2012ZDIIKY01.0）的要求对知情同意书进行修改，具体内容如下：

- 1、增加对比剂用量不高于心脏大血管磁共振增强扫描推荐用量的说明。
- 2、对检查时间长度进行具体说明。
- 3、对正常人关于补贴办法修改为“提供交通、工时等补贴 500 元”，对中途退出者要说清补贴方法。
- 4、写明项目由中大临床研究伦理委员会批准。

特此说明。

附件：修改后的知情同意书

东南大学附属中大医院  
放射科

2012 年 3 月 2 日

---

**回 执**

☒ 同意 ☐ 不同意 东南大学附属中大医院放射科开展“磁共振对正常人心脏功能和心肌状态相关指标的调查研究”。

主席签名：

日期：2012 年 3 月 2 日

东南大学附属中大医院临床研究伦理委员会（盖章）
